# Supplementary material for: The wild species genome ancestry of domestic chickens
Source: bioRxiv or medRxiv preprint supplement (doi:10.1101/711366), 2019-07-31
Supplement: Supplementary file [file media-1.pdf]

## Supplementary Materials

**Full title: The wild species genome ancestry of domestic chickens**

**Short title: Chicken genome ancestry**

Raman Akinyanju Lawal<sup>1,2\*#</sup>, Simon H. Martin<sup>3,4</sup>, Koen Vanmechelen<sup>5</sup>, Addie Vereijken<sup>6</sup>, Pradeepa Silva<sup>7</sup>, Raed Mahmud Al-Atiyat<sup>8</sup>, Riyadh Salah Aljumaah<sup>9</sup>, Joram M. Mwacharo<sup>10</sup>, Dong-Dong Wu<sup>11,12</sup>, Ya-Ping Zhang<sup>11,12</sup>, Paul M. Hocking<sup>13†</sup>, Jacqueline Smith<sup>13</sup>, David Wragg<sup>14</sup> & Olivier Hanotte<sup>1, 14,15\*</sup>

<sup>1</sup>Cells, Organisms and Molecular Genetics, School of Life Sciences, University of Nottingham, NG7 2RD, Nottingham, United Kingdom

<sup>2,#</sup>The Jackson Laboratory, 600 Main Street, Bar Harbor, ME 04609, USA

<sup>3</sup>Institute of Evolutionary Biology, University of Edinburgh, EH9 3FL, Edinburgh, United Kingdom

<sup>4</sup>Department of Zoology, University of Cambridge, CB2 3EJ, Cambridge, United Kingdom

<sup>5</sup>Open University of Diversity - Mouth Foundation, Hasselt, Belgium

<sup>6</sup>Hendrix Genetics, Technology and Service B.V., P.O. Box 114, 5830, AC, Boxmeer, The Netherlands

<sup>7</sup>Department of Animal Sciences, Faculty of Agriculture, University of Peradeniya, Sri Lanka

<sup>8</sup>Genetics and Biotechnology, Animal Science Department, Agriculture Faculty, Mutah University, Karak, Jordan

<sup>9</sup>Department of Animal Production, King Saud University, Saudi Arabia

<sup>10</sup>Small Ruminant Genomics, International Centre for Agricultural Research in the Dry Areas (ICARDA), P.O. Box 5689, ILRI-Ethiopia Campus, Addis Ababa, Ethiopia

<sup>11</sup>Center for Excellence in Animal Evolution and Genetics, Chinese Academy of Sciences, 650223 Kunming, China

<sup>12</sup>State Key Laboratory of Genetic Resources and Evolution, Kunming Institute of Zoology, Chinese Academy of Sciences, 650223 Kunming, China.

<sup>13</sup>The Roslin Institute and Royal (Dick) School of Veterinary Studies, University of Edinburgh, Easter Bush Campus, Midlothian, EH25 9RG, UK

<sup>14</sup>Centre for Tropical Livestock Genetics and Health, The Roslin Institute, EH25 9RG, Edinburgh, UK

<sup>15</sup>LiveGene, International Livestock Research Institute (ILRI), P. O. 5689, Addis Ababa, Ethiopia

†Deceased

#Present address

\*Correspondence: lawalakinyanju@yahoo.com and olivier.hanotte@nottingham.ac.uk

**The content of this supplementary materials is as below:**

**Fig. S1A and B:** Exon phylogeny and TreeMix

**Fig. S2 – S4:** Plots for the introgression from domestic chicken/Red junglefowl to Grey junglefowl

**Fig. S5 – S11:** Plots for the introgression from Grey junglefowl to domestic chicken/Red junglefowl

**Fig. S12:** Genome *fd* plots for the comparison between Ceylon junglefowl and domestic chicken

**Fig. S13 – S14:** Plots for the introgression from Ceylon junglefowl to domestic chicken.

**Fig. S15:** Genome *fd* plots for the comparison between Green junglefowl and domestic chicken

**Fig. S16:** Plots for the introgression from Green junglefowl to domestic chicken

**Table S1:** Sampling, mapping and variants statistics

**Table S2A and B:** Candidate introgressed regions

**Table S3:** Functional annotations for the enriched genes within the introgressed regions

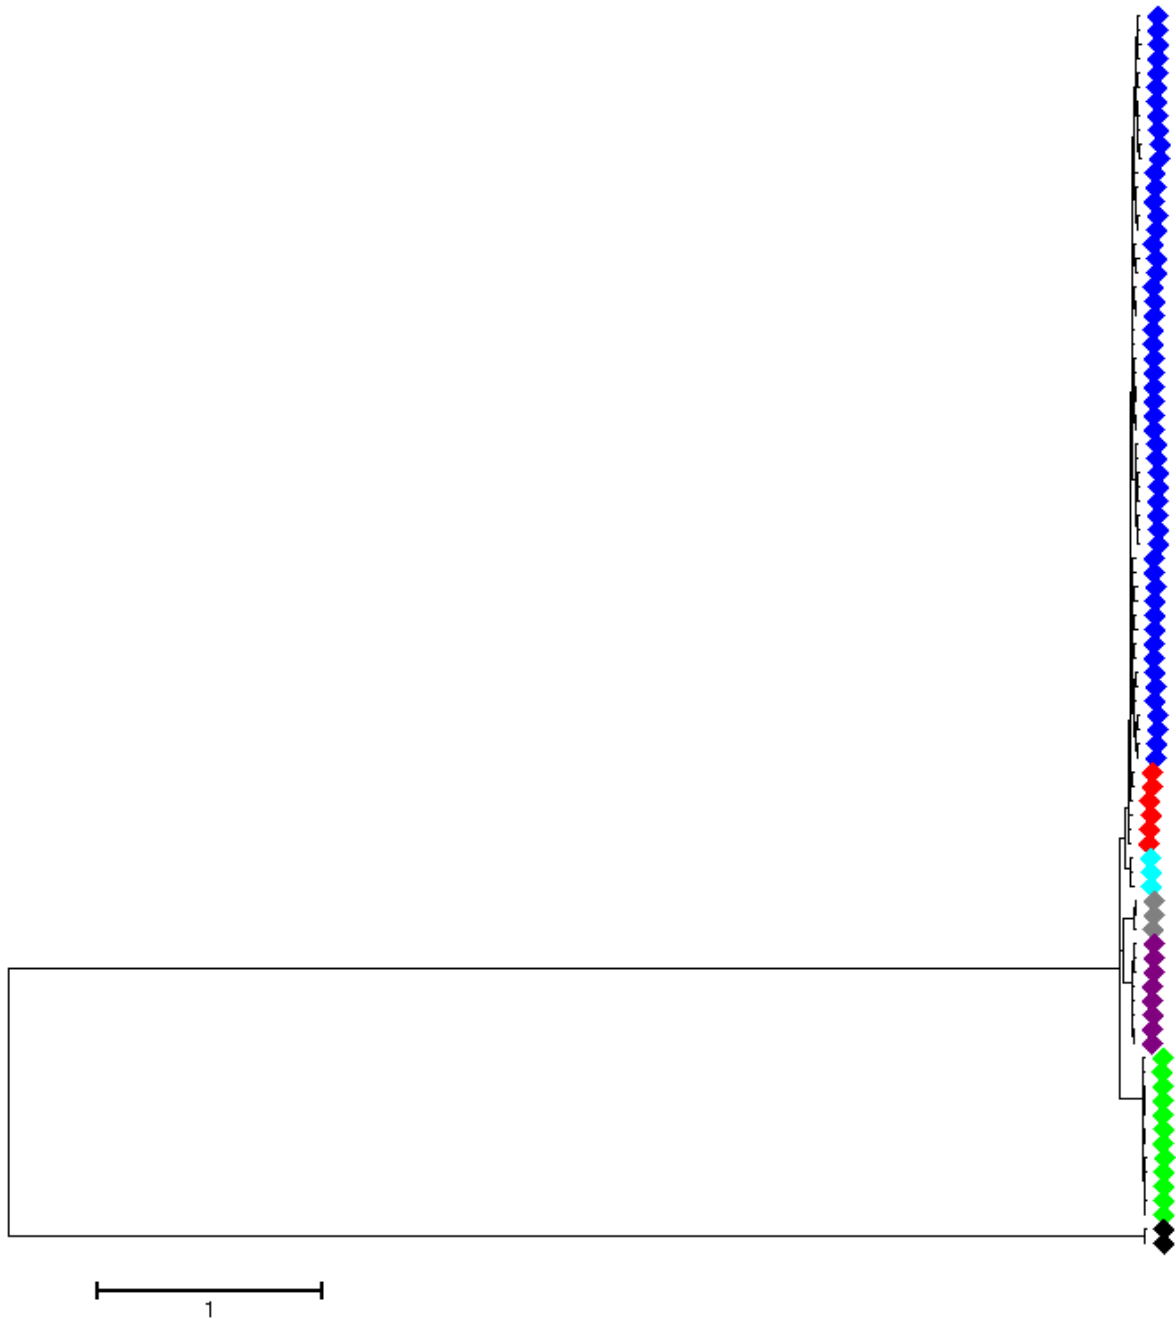

**Fig. S1A.** Maximum likelihood tree generated from 1,849,580 exon SNPs with GTR model. All branches are supported by 100% bootstrap values. The colour for the taxon markers are ◆: Domestic chicken, ◆: Red junglefowl, ◆: Javan red junglefowl, ◆: Grey junglefowl, ◆: Ceylon junglefowl, ◆: Green junglefowl, ◆: common Pheasant.

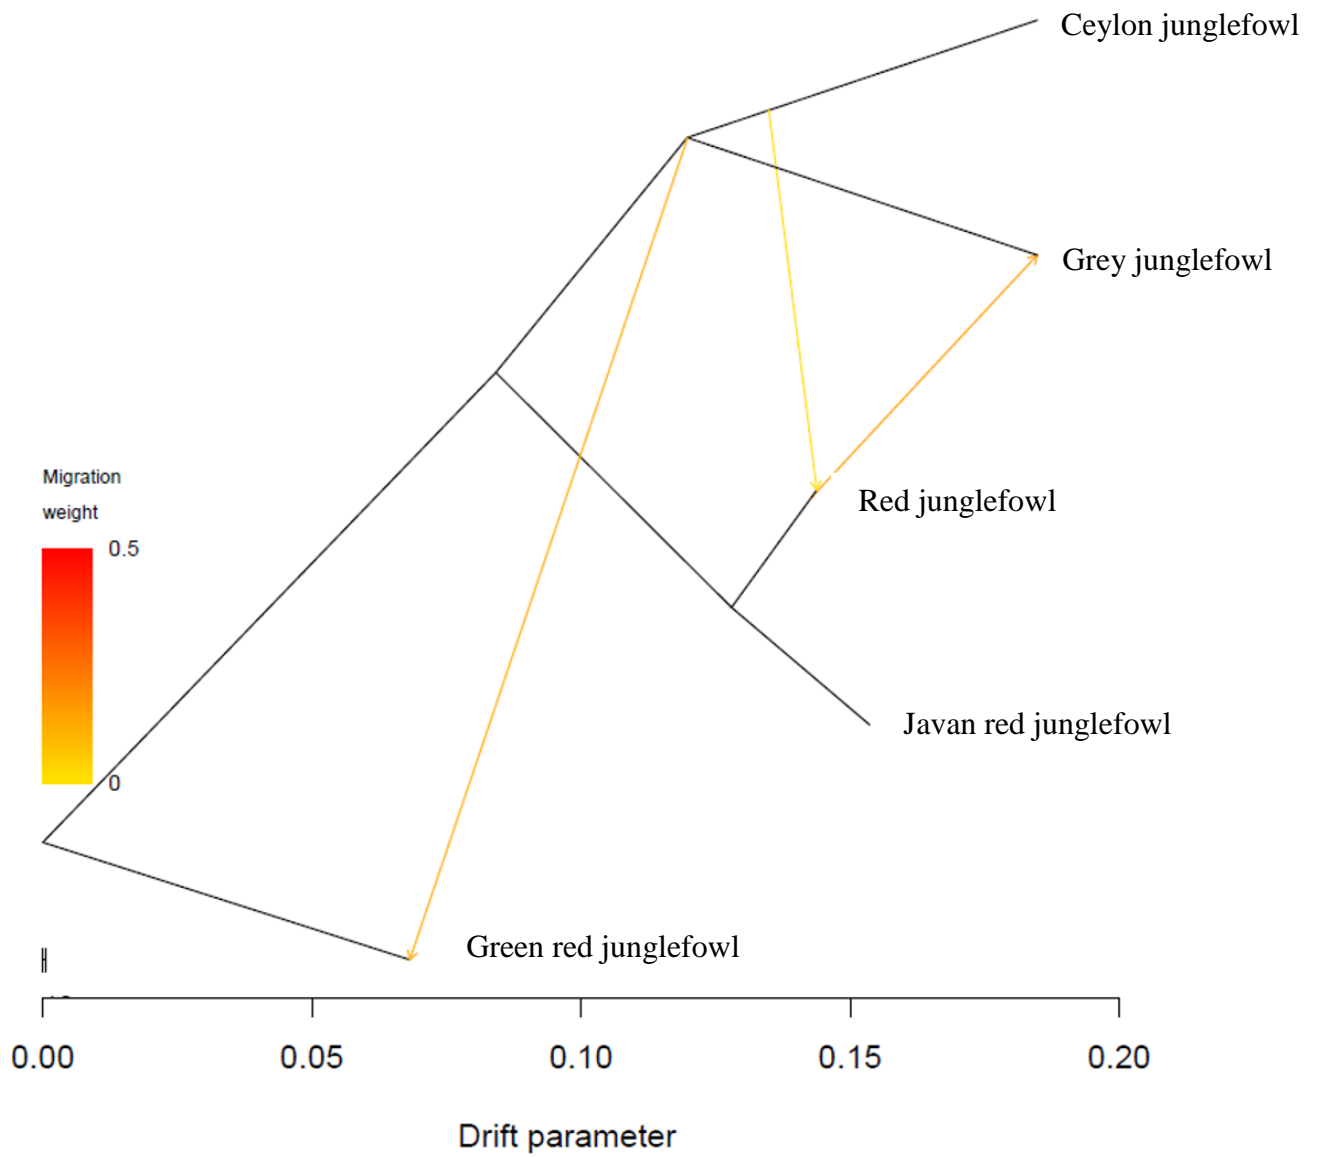

**Fig. S1B.** TreeMix across the autosomal genome

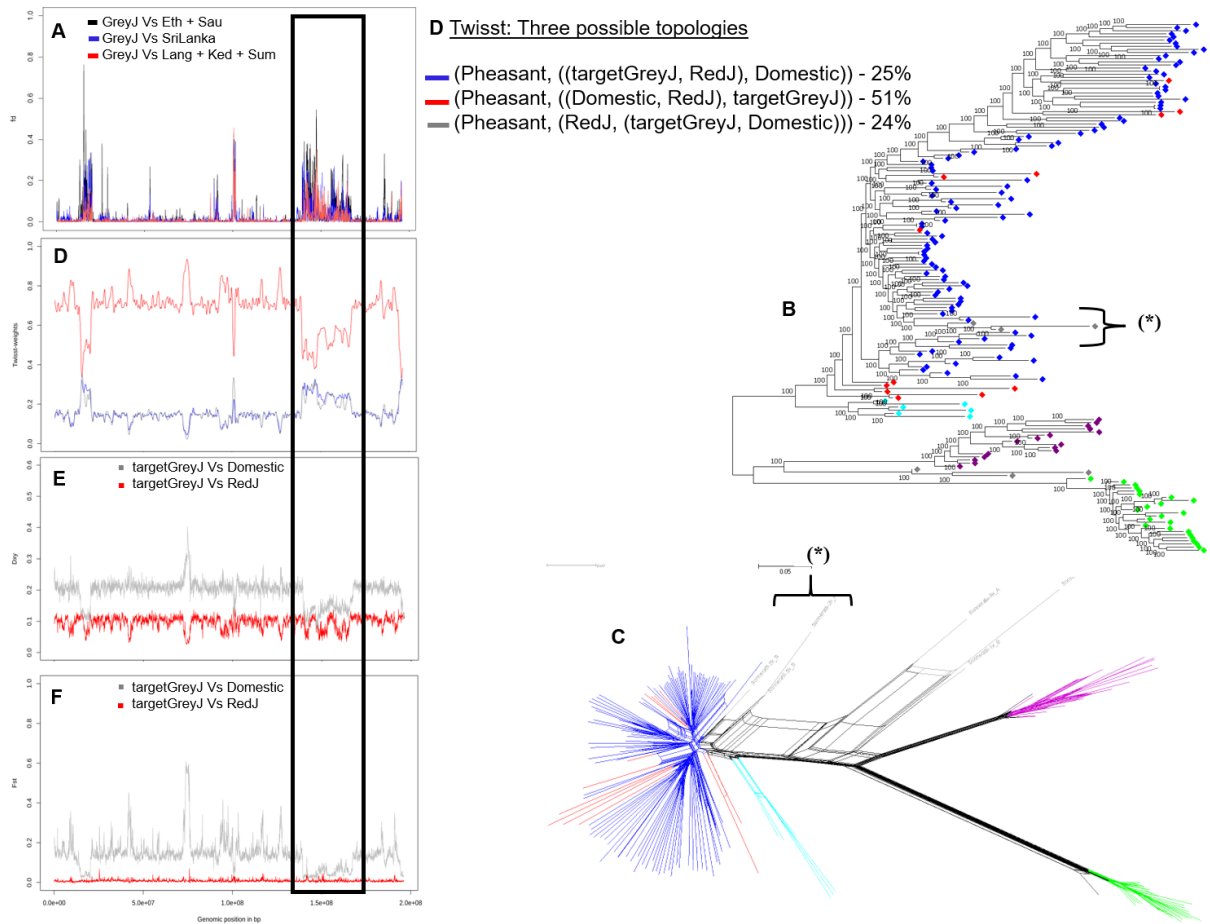

**Fig. S2.** A 26 Mb (Chr1: 141287737 - 167334186 bp) introgressed region from domestic chicken into Grey junglefowl. **(A)** fd plot for chromosome 1, **(B)** haplotype-based network and **(C)** maximum likelihood tree for the introgressed region, **(D)** *Twisst* plot and the proportion of each topology in the introgressed region, **(E)**  $D_{XY}$  and **(F)**  $F_{ST}$ . Eth, Sau, SriLanka, Lang, Ked, Sum represent chicken samples from Ethiopia, Saudi, Sri Lanka, Langshan, Kedu Hitam and Sumatra, respectively, GreyJ represent Grey junglefowl, and targetGreyJ are the introgressed (\*) Grey junglefowl haplotypes. domestic include all the domestic chicken populations. The colours for **(B)** and **(C)** defining each species are;  $\blacklozenge$ : Domestic chicken  $\blacklozenge$ : Red junglefowl,  $\blacklozenge$ : Javan red junglefowl,  $\blacklozenge$ : Grey junglefowl,  $\blacklozenge$ : Ceylon junglefowl,  $\blacklozenge$ : Green junglefowl,  $\blacklozenge$ : common Pheasant.

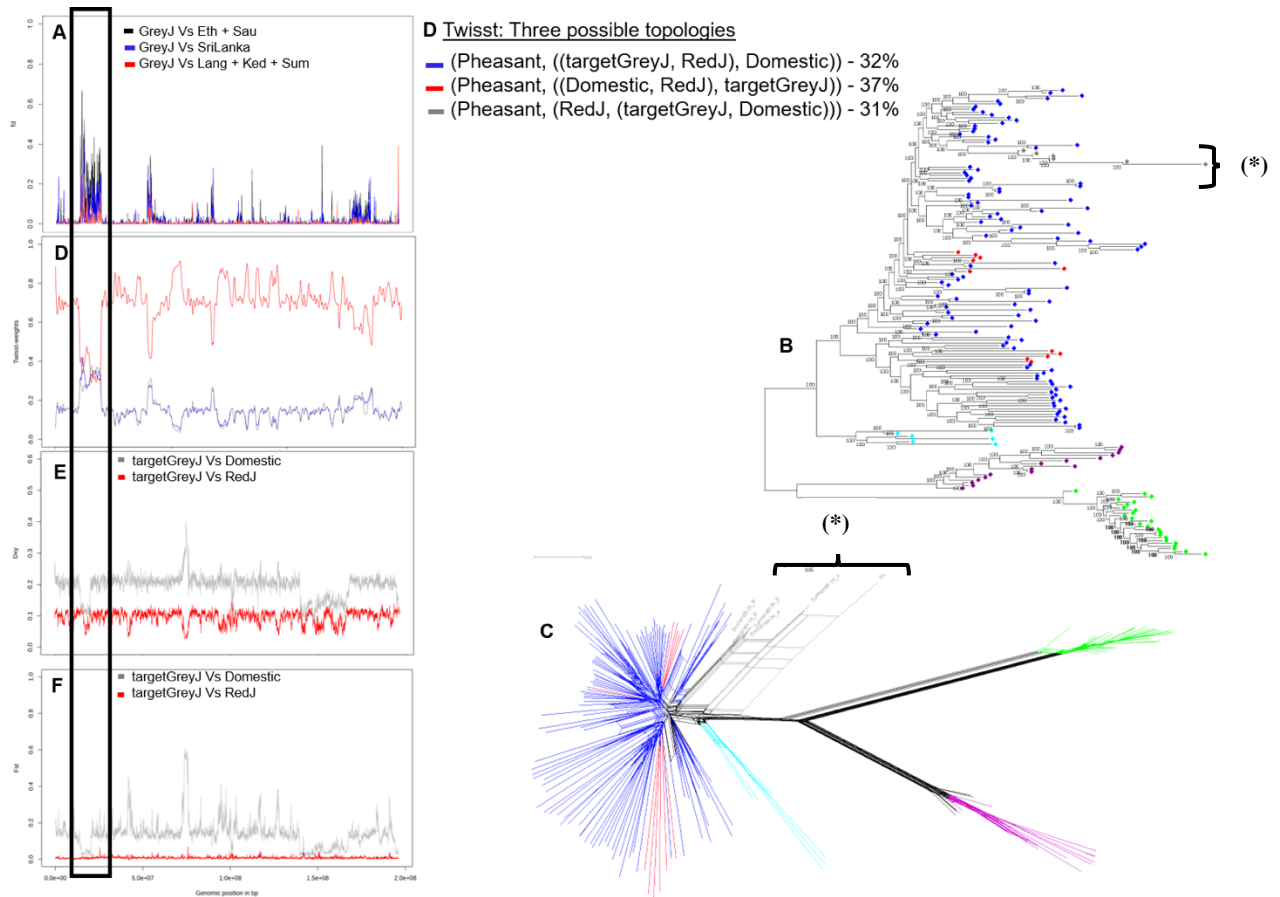

**Fig. S3.** A 9 Mb (Chr2: 11022874 - 19972089 bp) introgressed region from domestic chicken to Grey junglefowl. **(A)** fd plot for chromosome 1, **(B)** maximum likelihood tree for the introgressed region, **(C)** haplotype-based network, **(D)** *Twisst* plot and the proportion of each topology in the introgressed region, **(E)**  $D_{XY}$  and **(F)**  $F_{ST}$ . Eth, Sau, SriLanka, Lang, Ked, Sum represent chicken samples from Ethiopia, Saudi, Sri Lanka, Langshan, Kedu Hitam and Sumatra, respectively, GreyJ represent Grey junglefowl, and targetGreyJ are the introgressed (\*) Grey junglefowl haplotypes. Domestic include all the domestic chicken populations. The colours for **(B)** and **(C)** defining each species are;  $\blacklozenge$ : Domestic chicken  $\blacklozenge$ : Red junglefowl,  $\blacklozenge$ : Javan red junglefowl,  $\blacklozenge$ : Grey junglefowl,  $\blacklozenge$ : Ceylon junglefowl,  $\blacklozenge$ : Green junglefowl,  $\blacklozenge$ : common Pheasant.

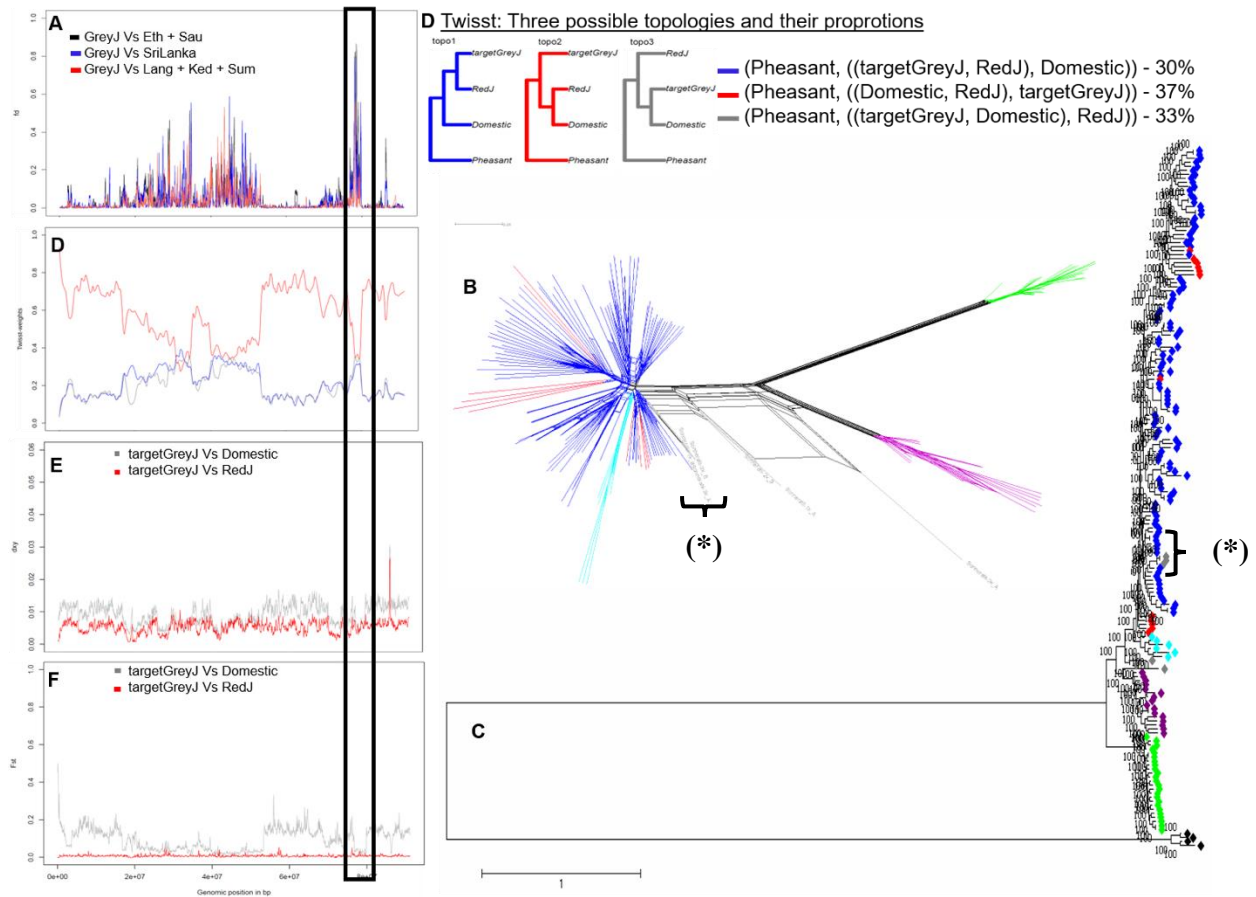

**Fig. S4.** A 2.8 Mb (Chr4: 76429662 - 79206239bp) introgressed region from domestic chicken/Red junglefowl into Grey junglefowl. (A)  $f_d$  plot for chromosome 4, (B) haplotype-based network, (C) maximum likelihood tree, (D) *Twisst* plot, its topologies and their proportions, (E)  $D_{XY}$  and (F)  $F_{ST}$ . Eth, Sau, SriLanka, Lang, Ked and Sum are domestic chicken from Ethiopia, Saudi, Sri Lanka and Langshan, KeduHitam and Sumatra breeds, respectively. GreyJ is Grey junglefowl, and targetGreyJ are the introgressed Grey junglefowl haplotypes (\*). Domestic includes all the chicken domestic populations. ◆: Domestic chicken; ◆: Red junglefowl, ◆: Javan red junglefowl, ◆: Grey junglefowl, ◆: Ceylon junglefowl, ◆: Green junglefowl, ◆: common Pheasant.

Description for **Fig. S5 - S11**

The plots are zoomed close to the region. **(A)** fd plot, **(B)** haplotype-based network and **(C)** maximum likelihood tree for the introgressed region **(D)** *Twisst* plot and the proportion of each topology in the introgressed region **(E)**  $D_{XY}$  and **(F)**  $F_{ST}$ . Eth, Sau, SriLanka, Lang, Ked, Sum represent chicken samples from Ethiopia, Saudi, Sri Lanka, Langshan, Kedu Hitam and Sumatra, respectively, GreyJ represent Grey junglefowl, and targetDom are the introgressed (\*) domestic haplotypes. The colours for **(B)** and **(C)** defining each species are  $\blacklozenge$ : Domestic chicken  $\blacklozenge$ : Red junglefowl,  $\blacklozenge$ : Javan red junglefowl,  $\blacklozenge$ : Grey junglefowl,  $\blacklozenge$ : Ceylon junglefowl,  $\blacklozenge$ : Green junglefowl,  $\blacklozenge$ : common Pheasant.

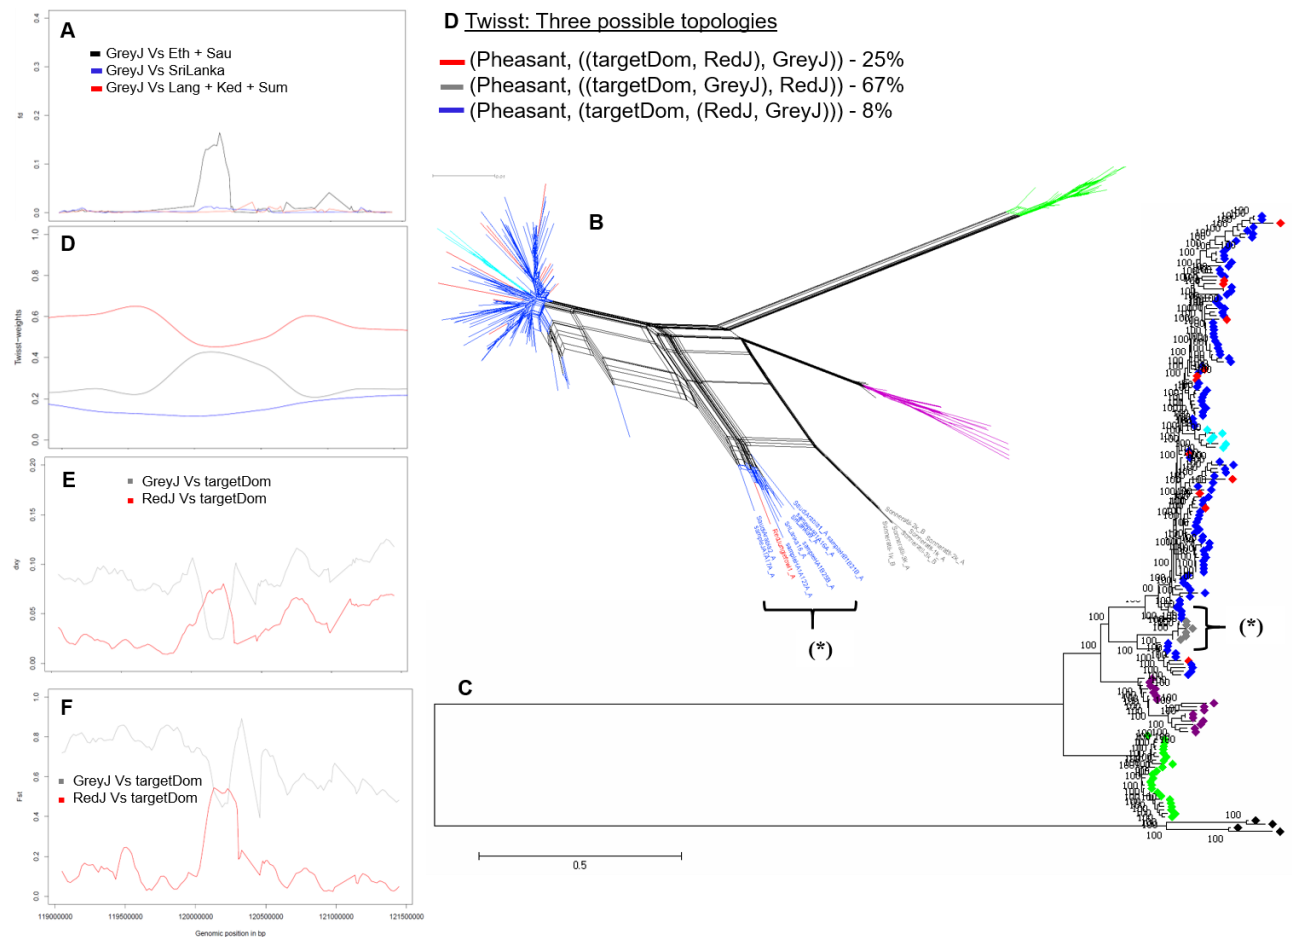

**Fig. S5.** A 220 kb (Chr 2: 119676880 - 119901132bp) candidate introgressed region from Grey junglefowl to domestic chicken/Red junglefowl. targetDom here include the introgressed domestic chicken and a single Red junglefowl haplotypes (\*).



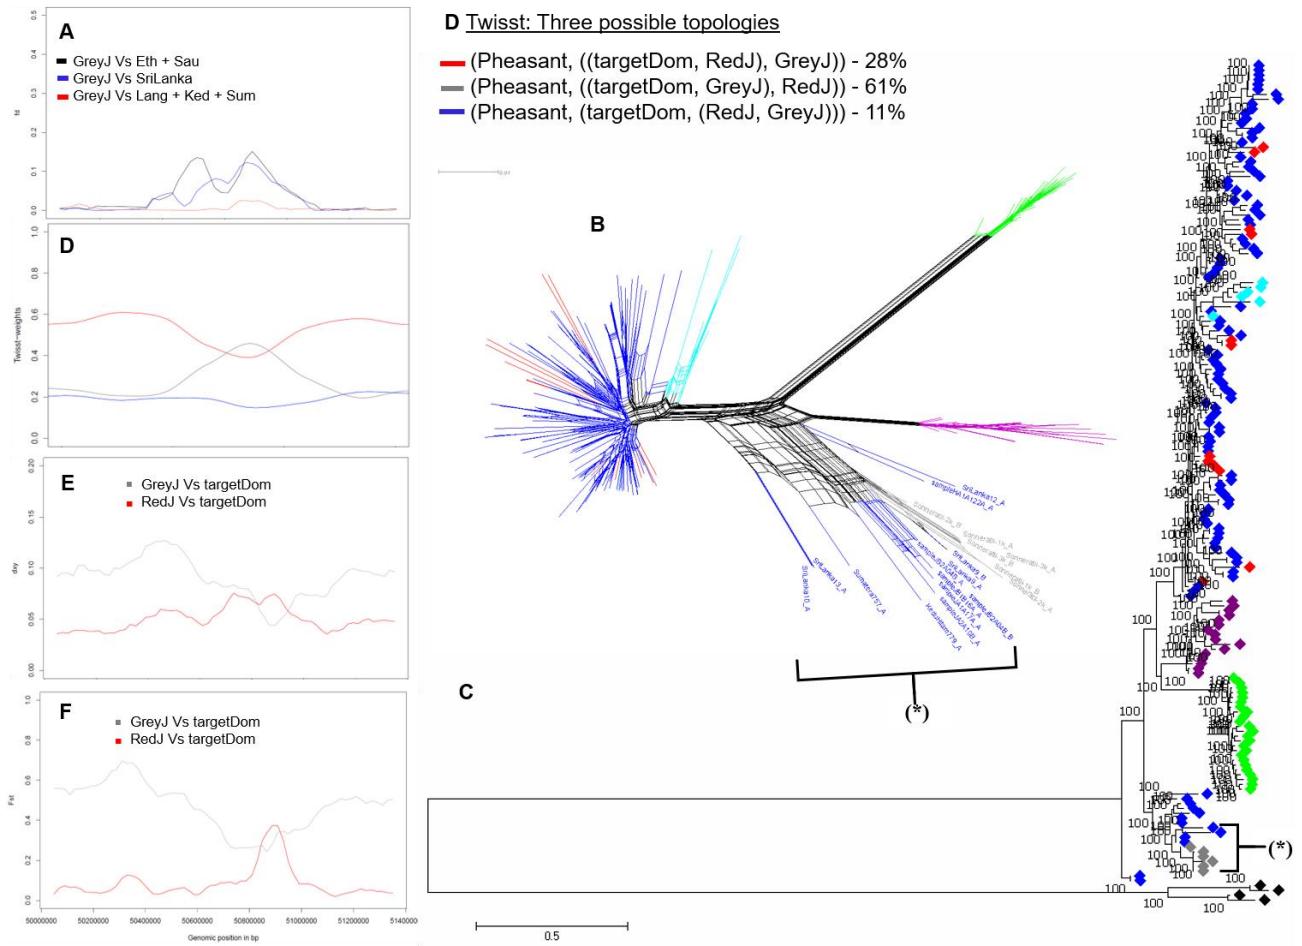

**Fig. S6.** A 100 kb (Chr 3: 50759656 - 50859645 bp) introgressed region from Grey junglefowl into domestic chicken.



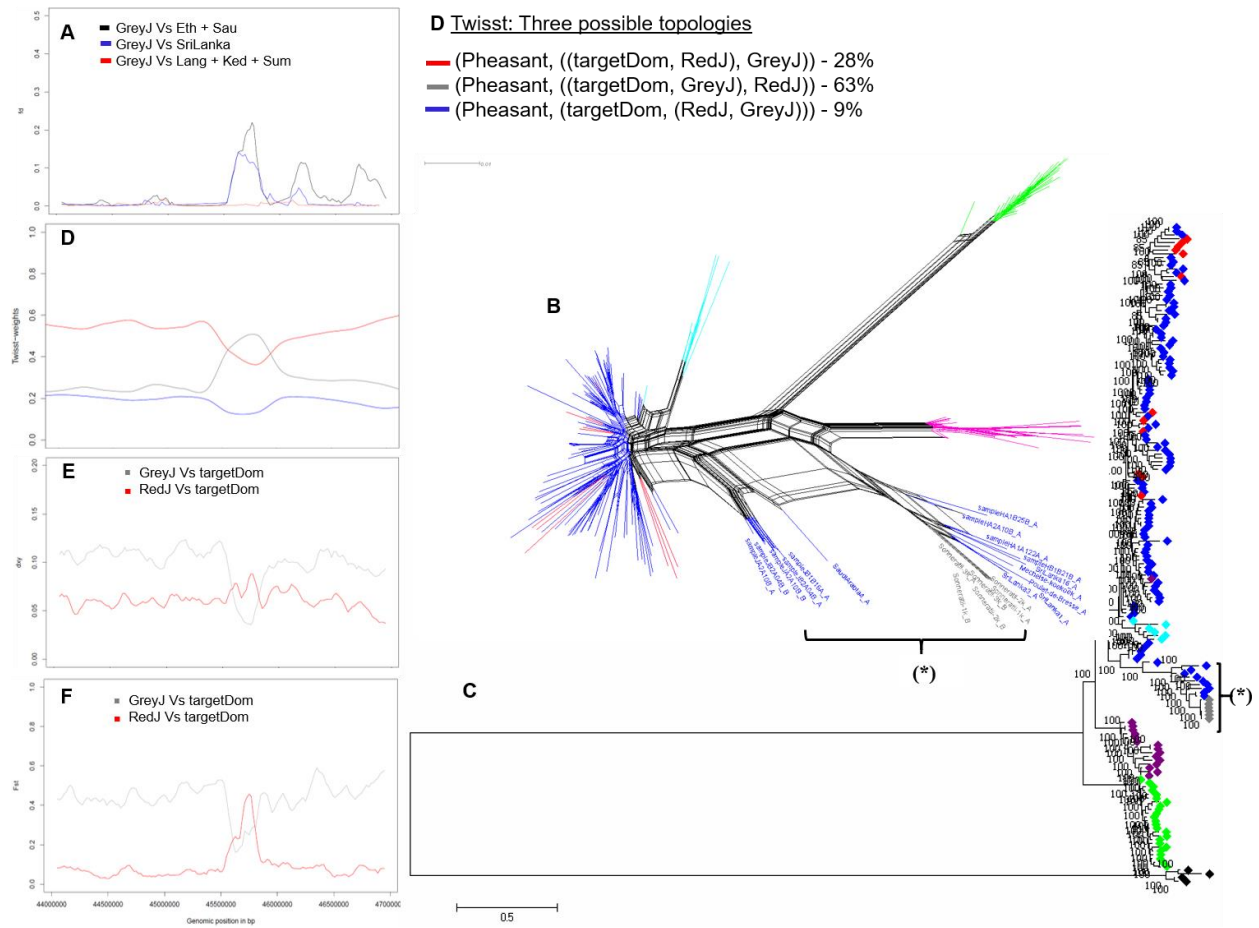

**Fig. S8.** A 280 kb (Chr 5: 45674368 - 45954418 bp) introgressed region from Grey junglefowl into domestic chicken.

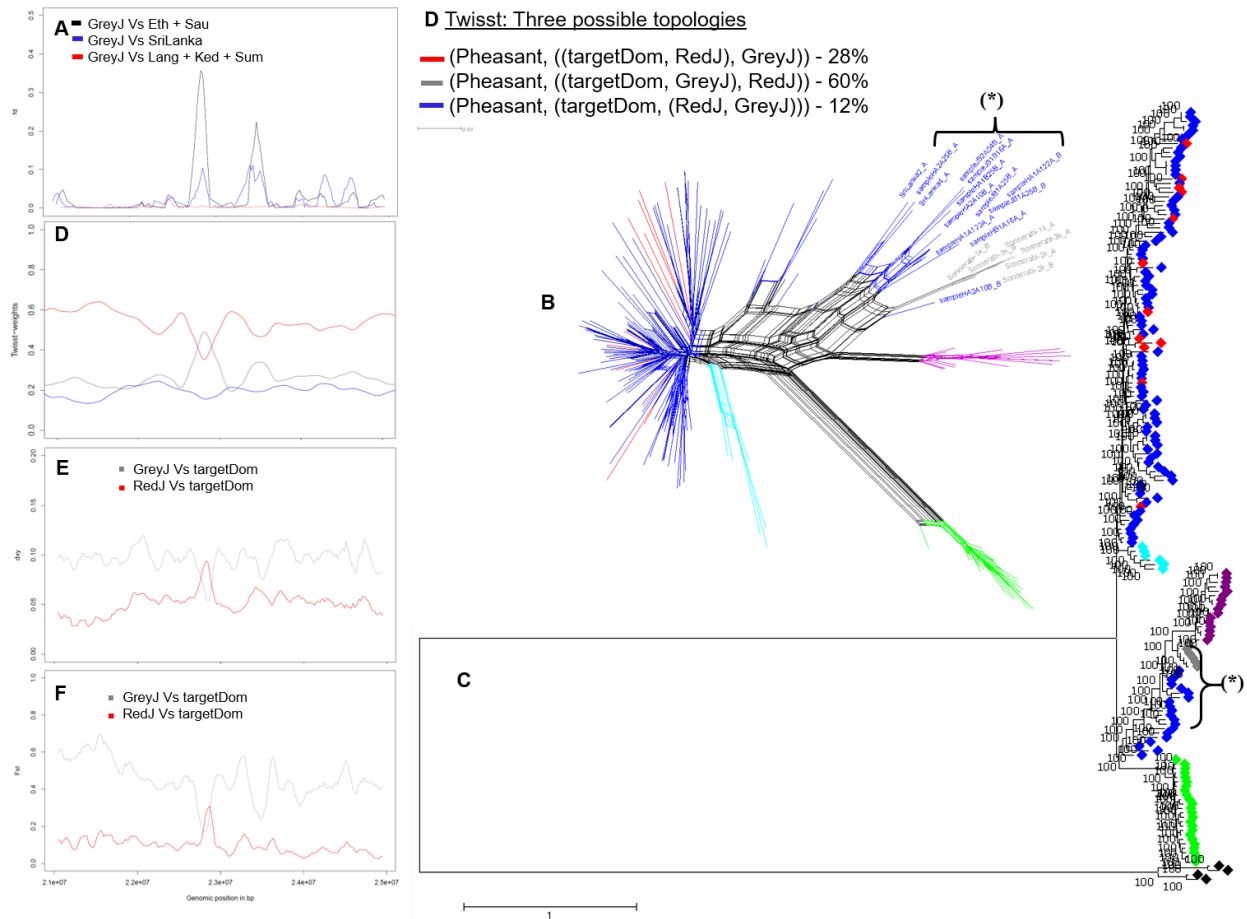

**Fig. S9.** A 140 kb (Chr 7: 22652767 - 22792759 bp) introgressed region from Grey junglefowl into domestic chicken.

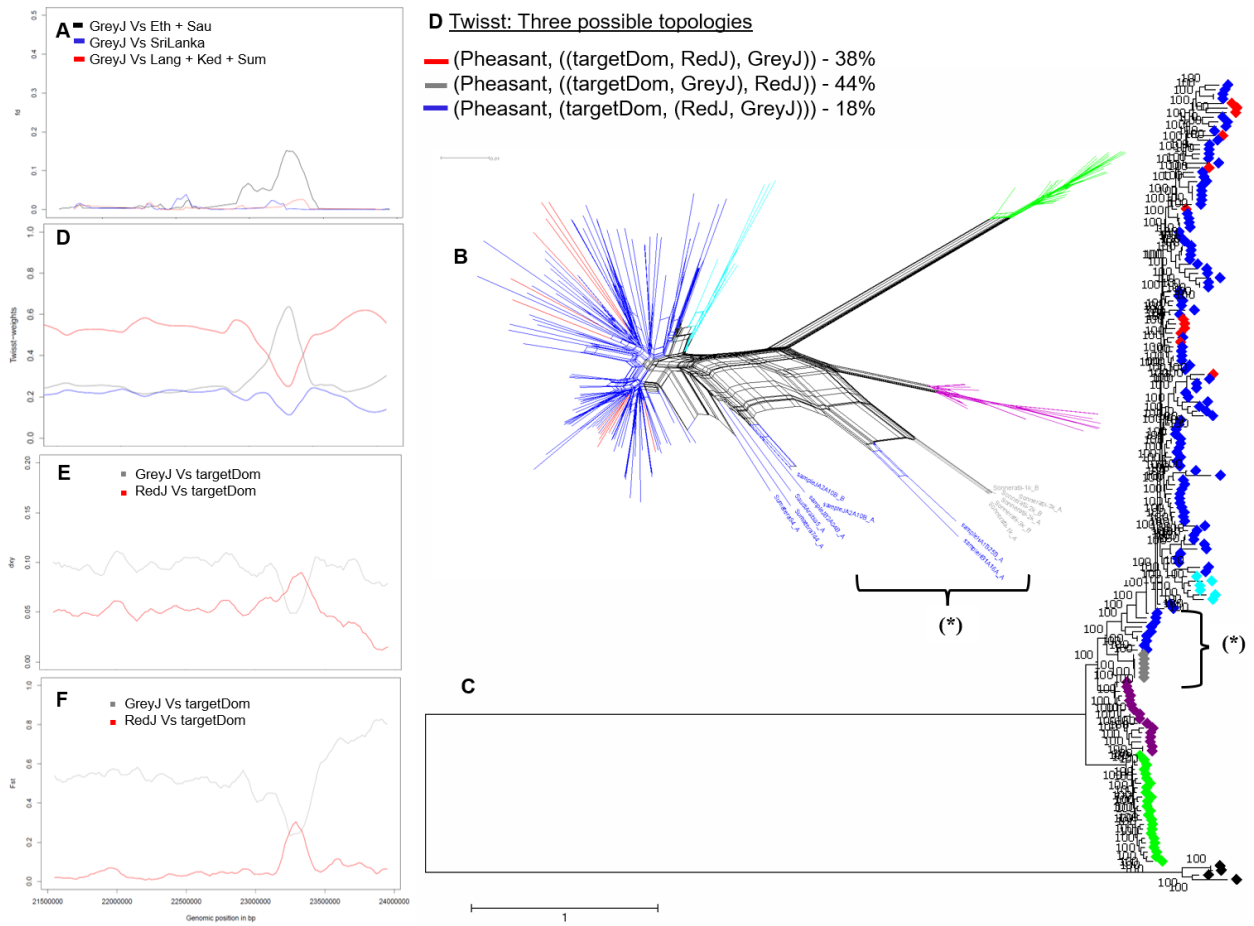

**Fig. S10.** A 500 kb (Chr 9: 23052049 - 23552045 bp) introgressed region from Grey junglefowl into domestic chicken.



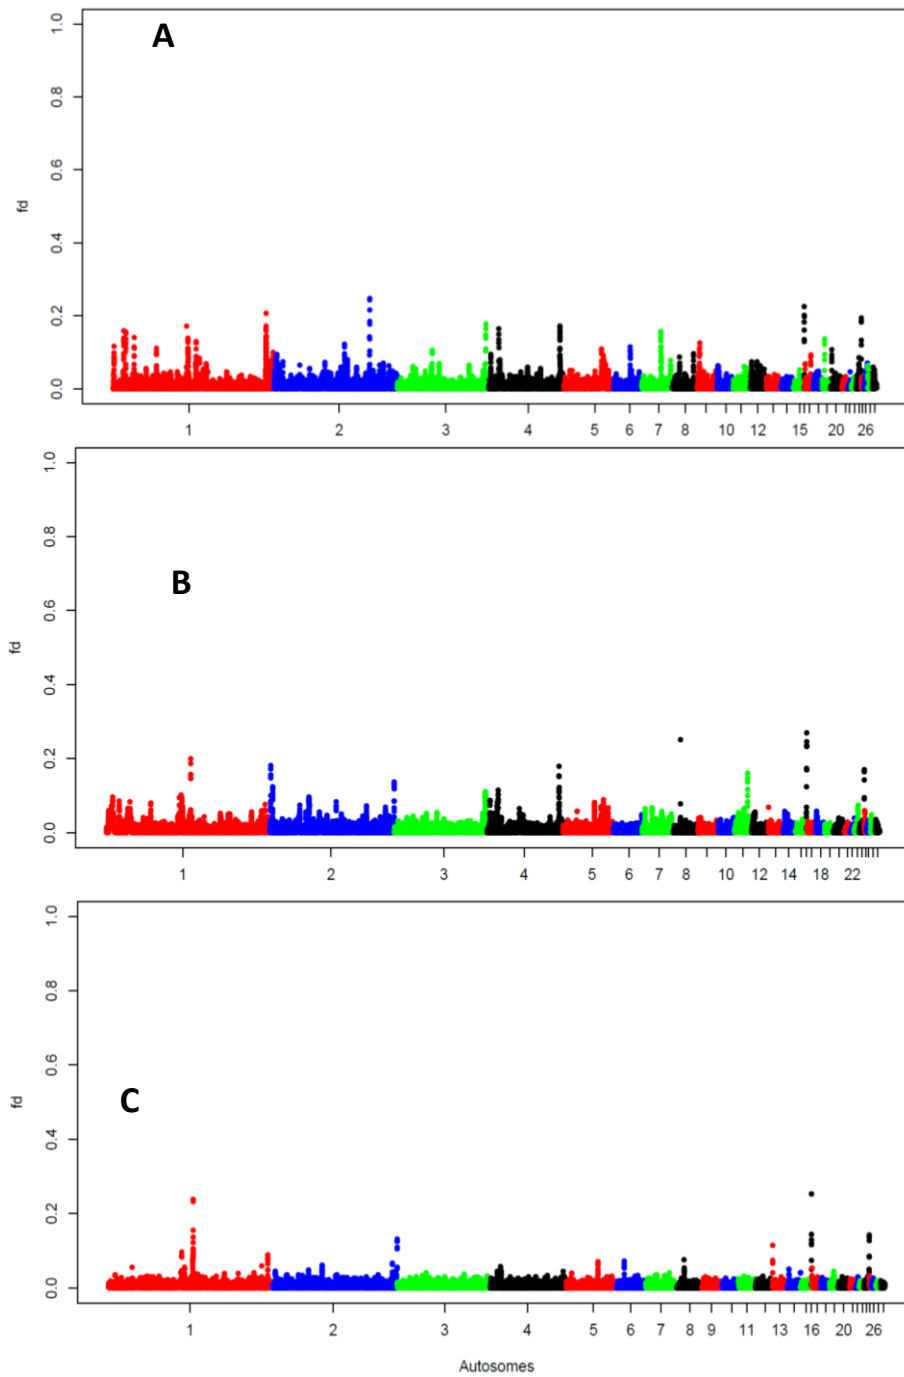

**Fig. S12.** The *fd* plots test for the comparison between Ceylon junglefowl and domestic chicken population from (A) Ethiopia and Saudi, (B) Sri Lanka and (C) Southeast and East Asia. The Y-axis *fd* value and X-axis 1 – 28 autosomes.

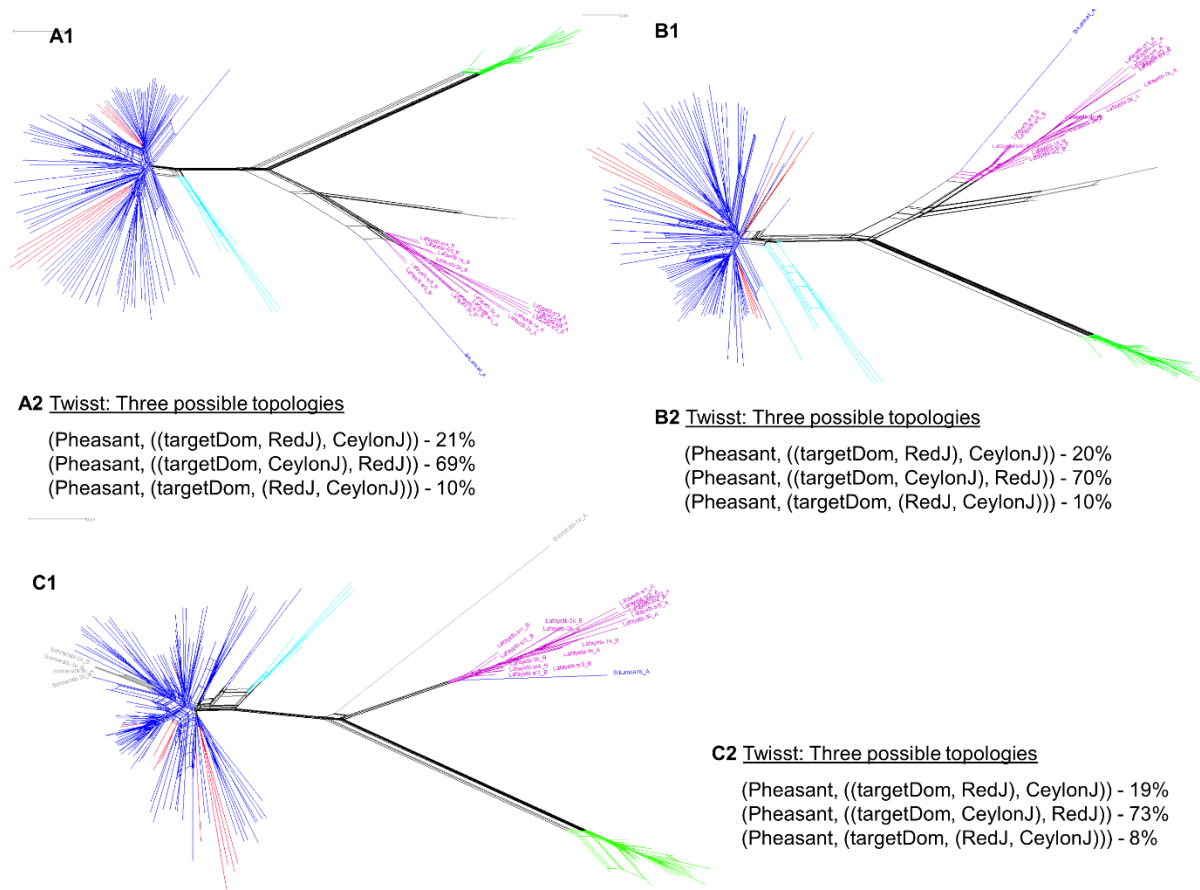

**Fig. S13.** Network and *Twisst* proportion of topologies for three Ceylon candidate introgressed regions into domestic chicken (**A - C**). (**A1**) and (**A2**) 6.52 Mb region Chr 1: 2895616 - 9418660 bp, (**B1**) and (**B2**) 3.95 Mb Chr 1: 25261354 - 29205161 bp, (**C1**) and (**C2**) 1.38 Mb region Chr 1: 147936229 - 149316591 bp. (**C1**) also shows support for introgression from domestic chicken to some Grey junglefowl haplotypes at the same region.



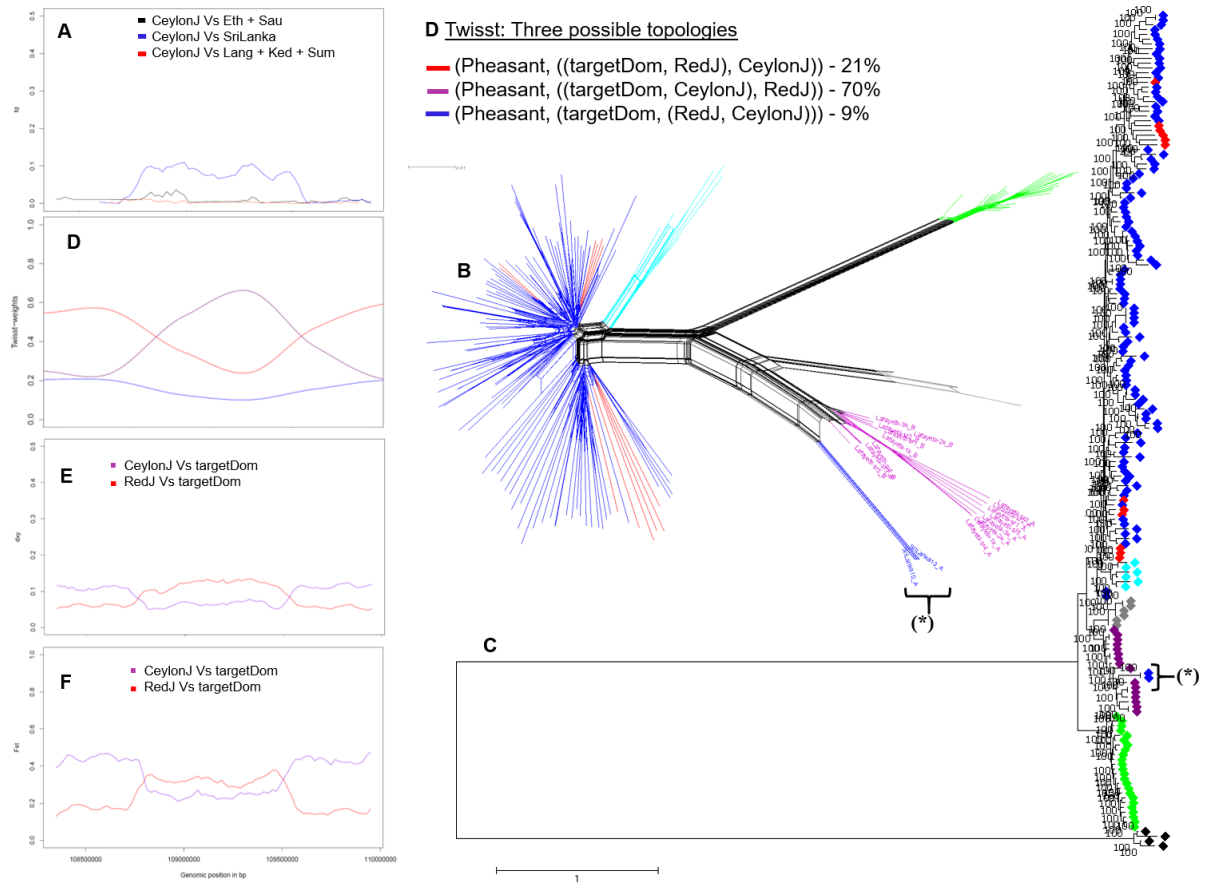

**Fig. S14.** A 600 kb (Chr 3: 108325801 - 108925723 bp) introgressed region from Ceylon junglefowl to domestic chicken. (A) *fd* plot (B) haplotype-based network, (C) maximum likelihood tree, (D) *Twisst* plot and the proportion of each topology, (E)  $D_{XY}$  and (F)  $F_{ST}$ . Eth, Sau, SriLanka, Lang, Ked, Sum are domestic chicken from Ethiopia, Saudi, Sri Lanka and Langshan, Kedu Hitam and Sumatra breeds, respectively, CeylonJ is Ceylon junglefowl and targetDom are the introgressed domestic chicken haplotypes (\*). ◆: Domestic chicken; ◆: Red junglefowl, ◆: Javan red junglefowl, ◆: Grey junglefowl, ◆: Ceylon junglefowl, ◆: Green junglefowl, ◆: common Pheasant.

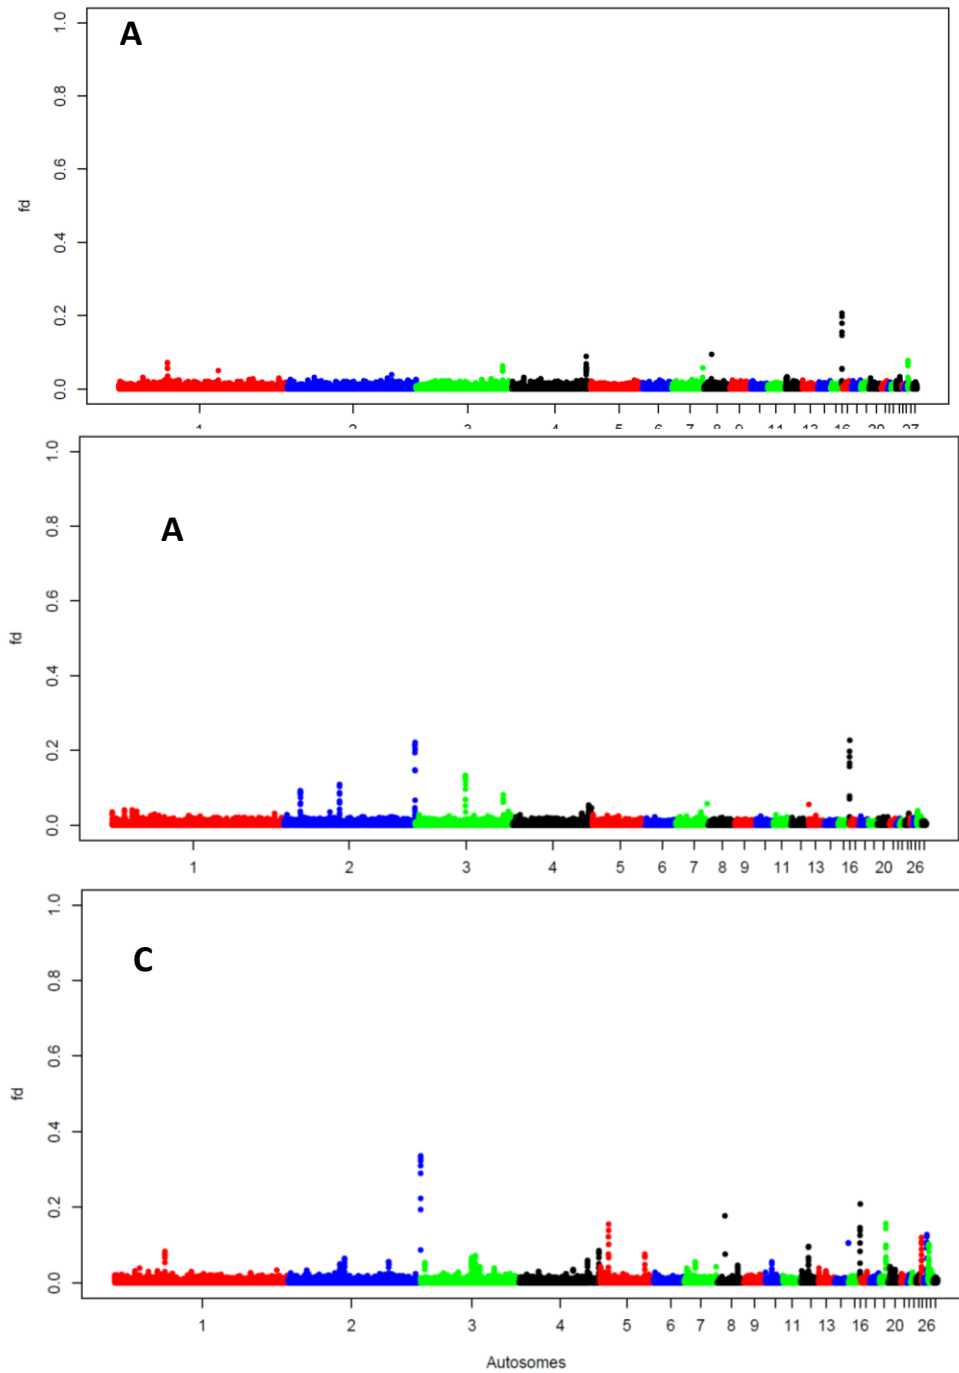

**Fig. S15.** The *fd* plots test for the comparison between Green junglefowl and domestic chicken population from (A) Ethiopia and Saudi, (B) Sri Lanka and (C) Southeast and East Asia. The Y-axis *fd* value and X-axis 1 – 28 autosomes.



**Table S1.** Sampling, mapping and variants statistics. HomAA and HetRA are the proportion of homozygous and heterozygous SNPs to the reference (*Galgal5.0*), respectively.

| <b>Sample Name</b> | <b>Species Name</b>      | <b>Geographic Distribution/Collection Point</b> | <b>Mapped Rate</b> | <b>Properly paired rate</b> | <b>HomAA%</b> | <b>HetRA%</b> | <b>Total SNPs (HomAA + HetRA)</b> |
|--------------------|--------------------------|-------------------------------------------------|--------------------|-----------------------------|---------------|---------------|-----------------------------------|
| HA1A12A            | Gallus gallus domesticus | Ethiopia                                        | 99.75              | 96.88                       | 49.78         | 50.22         | 5496987                           |
| HA1B25B            | Gallus gallus domesticus | Ethiopia                                        | 99.76              | 96.43                       | 43.95         | 56.05         | 5715229                           |
| HA2A10B            | Gallus gallus domesticus | Ethiopia                                        | 99.74              | 95.07                       | 44.74         | 55.26         | 5702301                           |
| HA2A25B            | Gallus gallus domesticus | Ethiopia                                        | 99.71              | 95.28                       | 42.42         | 57.58         | 5772262                           |
| HB1A16A            | Gallus gallus domesticus | Ethiopia                                        | 99.74              | 95.98                       | 42.13         | 57.87         | 5818311                           |
| HB1B21B            | Gallus gallus domesticus | Ethiopia                                        | 99.74              | 96.28                       | 42.75         | 57.25         | 5779878                           |
| JA1A17A            | Gallus gallus domesticus | Ethiopia                                        | 99.75              | 96.23                       | 46.25         | 53.75         | 5611611                           |
| JA2A10B            | Gallus gallus domesticus | Ethiopia                                        | 99.75              | 95.99                       | 47.24         | 52.76         | 5577330                           |
| JB1A25B            | Gallus gallus domesticus | Ethiopia                                        | 99.76              | 96.21                       | 52.97         | 47.03         | 5345839                           |
| JB1B16A            | Gallus gallus domesticus | Ethiopia                                        | 99.75              | 96.18                       | 42.44         | 57.56         | 5764815                           |
| JB2A04B            | Gallus gallus domesticus | Ethiopia                                        | 99.4               | 95.97                       | 55.19         | 44.81         | 5303913                           |
| SaudiArabia1       | Gallus gallus domesticus | Saudi Arabia                                    | 99.53              | 93.43                       | 51.31         | 48.69         | 5254695                           |
| SaudiArabia2       | Gallus gallus domesticus | Saudi Arabia                                    | 99.45              | 93.74                       | 41.01         | 58.99         | 5685951                           |
| SaudiArabia3       | Gallus gallus domesticus | Saudi Arabia                                    | 99.07              | 94.8                        | 44.38         | 55.62         | 5391149                           |
| SaudiArabia4       | Gallus gallus domesticus | Saudi Arabia                                    | 99.45              | 95.83                       | 24.23         | 75.77         | 6540870                           |
| SaudiArabia5       | Gallus gallus domesticus | Saudi Arabia                                    | 99.16              | 93.96                       | 41.35         | 58.65         | 5562922                           |
| SriLanka1          | Gallus gallus domesticus | Sri Lanka                                       | 99.14              | 94.21                       | 36.75         | 63.25         | 6083602                           |
| SriLanka10         | Gallus gallus domesticus | Sri Lanka                                       | 99.1               | 94.6                        | 37.4          | 62.6          | 6061984                           |
| SriLanka12         | Gallus gallus domesticus | Sri Lanka                                       | 99.21              | 93.83                       | 35.27         | 64.73         | 6175086                           |
| SriLanka13         | Gallus gallus domesticus | Sri Lanka                                       | 99.15              | 93.42                       | 37.41         | 62.59         | 6056414                           |
| SriLanka15         | Gallus gallus domesticus | Sri Lanka                                       | 99.16              | 93.1                        | 36.98         | 63.02         | 6105444                           |
| SriLanka16         | Gallus gallus domesticus | Sri Lanka                                       | 99.12              | 94.37                       | 36.27         | 63.73         | 6159000                           |
| SriLanka2          | Gallus gallus domesticus | Sri Lanka                                       | 99.04              | 94.38                       | 35.84         | 64.16         | 6106133                           |
| SriLanka3          | Gallus gallus domesticus | Sri Lanka                                       | 99.21              | 94.58                       | 36.76         | 63.24         | 6084710                           |
| SriLanka4          | Gallus gallus domesticus | Sri Lanka                                       | 98.98              | 94.51                       | 35.08         | 64.92         | 6196012                           |
| SriLanka5          | Gallus gallus domesticus | Sri Lanka                                       | 99.23              | 94.38                       | 35.81         | 64.19         | 6155422                           |
| SriLanka9          | Gallus gallus domesticus | Sri Lanka                                       | 99.2               | 94.27                       | 34.83         | 65.17         | 6163149                           |

|                  |                                |                                   |       |       |       |       |         |
|------------------|--------------------------------|-----------------------------------|-------|-------|-------|-------|---------|
| Langshan1        | Gallus gallus domesticus       | Langshan, China - Collected in UK | 99.79 | 98.99 | 64.19 | 35.81 | 4183574 |
| Langshan2        | Gallus gallus domesticus       | Langshan, China - Collected in UK | 99.89 | 99.07 | 62.76 | 37.24 | 4219311 |
| Langshan3        | Gallus gallus domesticus       | Langshan, China - Collected in UK | 99.84 | 98.73 | 67.7  | 32.3  | 4052704 |
| Langshan4        | Gallus gallus domesticus       | Langshan, China - Collected in UK | 99.87 | 98.3  | 59.37 | 40.63 | 4770695 |
| Langshan5        | Gallus gallus domesticus       | Langshan, China - Collected in UK | 99.89 | 99.06 | 61.98 | 38.02 | 4090606 |
| Langshan6        | Gallus gallus domesticus       | Langshan, China - Collected in UK | 99.86 | 99.03 | 61.29 | 38.71 | 4226957 |
| Langshan7        | Gallus gallus domesticus       | Langshan, China - Collected in UK | 99.85 | 97.49 | 63.9  | 36.1  | 4499626 |
| Langshan8        | Gallus gallus domesticus       | Langshan, China - Collected in UK | 99.87 | 98.29 | 62.04 | 37.96 | 4280925 |
| Sumatera738      | Gallus gallus domesticus       | Indonesia                         | 99.14 | 98.04 | 50.58 | 49.42 | 4556806 |
| Sumatera741      | Gallus gallus domesticus       | Indonesia                         | 99.12 | 97.52 | 57.44 | 42.56 | 4508322 |
| Sumatera744      | Gallus gallus domesticus       | Indonesia                         | 99.1  | 97.99 | 58.61 | 41.39 | 4450663 |
| Sumatera757      | Gallus gallus domesticus       | Indonesia                         | 99.1  | 97.26 | 51.82 | 48.18 | 4659515 |
| Sumatera94       | Gallus gallus domesticus       | Indonesia                         | 99.05 | 97.13 | 55.83 | 44.17 | 4193805 |
| KeduHitam761     | Gallus gallus domesticus       | Indonesia                         | 99.62 | 98.56 | 43.22 | 56.78 | 5458556 |
| KeduHitam763     | Gallus gallus domesticus       | Indonesia                         | 99.59 | 98.48 | 42.22 | 57.78 | 5551599 |
| KeduHitam766     | Gallus gallus domesticus       | Indonesia                         | 99.63 | 98.61 | 53.71 | 46.29 | 5205120 |
| KeduHitam767     | Gallus gallus domesticus       | Indonesia                         | 99.56 | 98.29 | 40.28 | 59.72 | 5745786 |
| KeduHitam778     | Gallus gallus domesticus       | Indonesia                         | 98.94 | 97.66 | 54.11 | 45.89 | 4996704 |
| KeduHitam779     | Gallus gallus domesticus       | Indonesia                         | 99.3  | 97.61 | 44.14 | 55.86 | 5324021 |
| KeduHitam780     | Gallus gallus domesticus       | Indonesia                         | 99.5  | 97.92 | 45.98 | 54.02 | 5424436 |
| KeduHitam781     | Gallus gallus domesticus       | Indonesia                         | 99.06 | 98    | 56.45 | 43.55 | 5035441 |
| KeduHitam783     | Gallus gallus domesticus       | Indonesia                         | 99.05 | 97.81 | 46.95 | 53.05 | 5126861 |
| KeduHitam784     | Gallus gallus domesticus       | Indonesia                         | 99.52 | 98.35 | 44.98 | 55.02 | 5238868 |
| Mechelse-koekoek | Gallus gallus domesticus       | Europe                            | 96.9  | 91.9  | 55.47 | 44.53 | 5206378 |
| Mechelse-styrian | Gallus gallus domesticus       | Europe                            | 97    | 92.89 | 34.66 | 65.34 | 6163592 |
| Poulet-de-Bresse | Gallus gallus domesticus       | Europe                            | 97.63 | 93.32 | 47.83 | 52.17 | 5554109 |
| RedJunglefowl1   | Gallus gallus (Red junglefowl) | Southeast Asia                    | 98.69 | 93.85 | 38.55 | 61.45 | 6090522 |
| RedJunglefowl2   | Gallus gallus (Red junglefowl) | Southeast Asia                    | 99.53 | 96.65 | 38.48 | 61.52 | 6322049 |
| RedJunglefowl3   | Gallus gallus (Red junglefowl) | Southeast Asia                    | 99.52 | 95.25 | 37.1  | 62.9  | 6721117 |
| RedJunglefowl4   | Gallus gallus (Red junglefowl) | Southeast Asia                    | 99.51 | 96.66 | 43.85 | 56.15 | 6432497 |
| RedJunglefowl5   | Gallus gallus (Red junglefowl) | Southeast Asia                    | 99.32 | 96    | 34.17 | 65.83 | 7055675 |

|                   |                                              |                                           |       |       |       |       |          |
|-------------------|----------------------------------------------|-------------------------------------------|-------|-------|-------|-------|----------|
| RedJungleFowlKoen | Gallus gallus (Red junglefowl)               | South/Southeast Asia - Private collection | 95.66 | 92.14 | 33.62 | 66.38 | 6790156  |
| Bankiva650        | Gallus gallus bankiva (Javan red junglefowl) | Indonesia                                 | 98.85 | 97.46 | 60.09 | 39.91 | 6880685  |
| Bankiva759        | Gallus gallus bankiva (Javan red junglefowl) | Indonesia                                 | 98.98 | 97.57 | 59.49 | 40.51 | 6890215  |
| Bankiva760        | Gallus gallus bankiva (Javan red junglefowl) | Indonesia                                 | 98.87 | 97.16 | 60.1  | 39.9  | 6811363  |
| Sonneratii1k      | Gallus sonneratii (Grey junglefowl)          | Indian subcontinent - Private collection  | 99.69 | 95.4  | 77.76 | 22.24 | 10050824 |
| Sonneratii2k      | Gallus sonneratii (Grey junglefowl)          | Indian subcontinent - Private collection  | 99.61 | 88.02 | 75.64 | 24.36 | 10115589 |
| Sonneratii3k      | Gallus sonneratii (Grey junglefowl)          | Indian subcontinent - Private collection  | 99.69 | 95.4  | 84.74 | 15.26 | 9432160  |
| Lafayetii1k       | Gallus lafayetti (Ceylon junglefowl)         | Sri Lanka - Private collection            | 99.61 | 90.84 | 79.78 | 20.22 | 10637322 |
| Lafayetii2k       | Gallus lafayetti (Ceylon junglefowl)         | Sri Lanka - Private collection            | 99.66 | 93.6  | 79.84 | 20.16 | 10619033 |
| Lafayetii3k       | Gallus lafayetti (Ceylon junglefowl)         | Sri Lanka - Private collection            | 99.67 | 95.1  | 85.73 | 14.27 | 10267990 |
| Lafayetiisr1      | Gallus lafayetti (Ceylon junglefowl)         | Sri Lanka - Private collection            | 98.93 | 92.66 | 74.06 | 25.94 | 11126055 |
| Lafayetiisr2      | Gallus lafayetti (Ceylon junglefowl)         | Sri Lanka                                 | 99.05 | 91.09 | 74.69 | 25.31 | 11091506 |
| Lafayetiisr3      | Gallus lafayetti (Ceylon junglefowl)         | Sri Lanka                                 | 98.88 | 91.5  | 72.73 | 27.27 | 11216350 |
| Lafayetiisr4      | Gallus lafayetti (Ceylon junglefowl)         | Sri Lanka                                 | 98.98 | 92.83 | 72.7  | 27.3  | 11215158 |
| Lafayetiisr5      | Gallus lafayetti (Ceylon junglefowl)         | Sri Lanka                                 | 98.75 | 89.28 | 72.53 | 27.47 | 11218503 |
| Varius1k          | Gallus varius (Green junglefowl)             | Indonesia - Private collection            | 99.52 | 85.65 | 87.94 | 12.06 | 12019627 |
| Varius2k          | Gallus varius (Green junglefowl)             | Indonesia - Private collection            | 99.54 | 90.03 | 88.04 | 11.96 | 12004164 |
| Varius3k          | Gallus varius (Green junglefowl)             | Indonesia - Private collection            | 99.61 | 94.6  | 86.74 | 13.26 | 11958988 |
| VariusJava18      | Gallus varius (Green junglefowl)             | Indonesia                                 | 98.54 | 96.26 | 90.56 | 9.44  | 10591696 |
| VariusJava19      | Gallus varius (Green junglefowl)             | Indonesia                                 | 98.47 | 96.51 | 82.54 | 17.46 | 11112951 |
| VariusMandura702  | Gallus varius (Green junglefowl)             | Indonesia                                 | 98.56 | 95.01 | 92.29 | 7.71  | 11077799 |
| VariusMandura703  | Gallus varius (Green junglefowl)             | Indonesia                                 | 98.83 | 94.31 | 88    | 12    | 11590408 |
| VariusMandura704  | Gallus varius (Green junglefowl)             | Indonesia                                 | 98.77 | 94.76 | 91.51 | 8.49  | 10841620 |
| VariusMandura706  | Gallus varius (Green junglefowl)             | Indonesia                                 | 98.71 | 93.73 | 89.48 | 10.52 | 11414585 |
| VariusMandura710  | Gallus varius (Green junglefowl)             | Indonesia                                 | 98.76 | 95.26 | 90.96 | 9.04  | 10429506 |

|                  |                                  |                 |       |       |       |      |          |
|------------------|----------------------------------|-----------------|-------|-------|-------|------|----------|
| VariusMandura714 | Gallus varius (Green junglefowl) | Indonesia       | 98.8  | 94.82 | 92.26 | 7.74 | 10620997 |
| VariusMandura715 | Gallus varius (Green junglefowl) | Indonesia       | 98.69 | 95.02 | 90.07 | 9.93 | 11322992 |
| PheasantsFemale  | Phasianus colchicus              | Collected in UK | 91.95 | 81.69 | 96.01 | 3.99 | 53278629 |
| PheasantsMale    | Phasianus colchicus              | Collected in UK | 93    | 83.47 | 94.19 | 5.81 | 56157598 |

---

**Table S2A.** Candidate introgressed regions from domestic chicken and/or Red junglefowl into Grey/Ceylon junglefowls

| <b>Candidate introgressed regions*</b>                             | <b>Length</b> | <b>Genes within the candidate introgressed regions***</b>                                                                                                                                                                                                                                                                                                                                                                                                                                                                                                                                                                                                                                                                                                                                            |
|--------------------------------------------------------------------|---------------|------------------------------------------------------------------------------------------------------------------------------------------------------------------------------------------------------------------------------------------------------------------------------------------------------------------------------------------------------------------------------------------------------------------------------------------------------------------------------------------------------------------------------------------------------------------------------------------------------------------------------------------------------------------------------------------------------------------------------------------------------------------------------------------------------|
| <b><i>Domestic chicken/Red junglefowl into Grey Junglefowl</i></b> |               |                                                                                                                                                                                                                                                                                                                                                                                                                                                                                                                                                                                                                                                                                                                                                                                                      |
| Chr1: 141.0 – 167.0                                                | 26 Mb         | <i>TNFSF13B, ABHD13, LIG4, FAM155A, ARGLU1, EFN2, SLC10A2, ERCC5, BIVM, KDELC1, TEX30, METTL21C, TPP2, FHF-4, ITGBL1, NALCN, TMTC4, GGACT, PCCA, ZIC2, ZIC5, CLYBL, TM9SF2, gga-mir-2984, UBAC2, GPR183, GPR18, DOCK9, SLC15A1, STK24, FARP1, gga-mir-1555, IPO5, RAP2A, MBNL2, UGGT2, DNAJC3, DZIP1, CLDN10, ABCC4, SOX21, GPR180, TGDS, DCT, RF00066, GPC5, gga-mir-92-1, gga-mir-19b, gga-mir-20a, gga-mir-19a, gga-mir-18a, gga-mir-17, SLITRK6, SLITRK1, SPRY2, NDFIP2, RBM26, RNF219, POU4F1, EDNRB, SLAIN1, MYCBP2, FBXL3, CLN5, GATD3A, ACOD1, KCTD12, LMO7, UCHL3, TBC1D4, KLF12, KLF5, PIBF1, DIS3, BORA, MZT1, DACH1, gga-mir-1743, KLHL1, PCDH9, RF00154, gga-mir-7445-2, TDRD3, DIAPH3, PCDH17, RF02271, RF00493, RF00494, OLFM4, PCDH8, CNMD, SUGT1, ELF1, WBP4, MTRF1, RGCC, VWA8</i> |
| Chr2: 11.0 – 20.0                                                  | 9 Mb          | <i>PFKP, PITRM1, KLF6, gga-mir-6628, GJD4, CCNY, CREM, CUL2, PARD3, RF02271, NR1, ITGB1, EPC1, gga-mir-1768, KIF5B, ARHGAP12, ZEB1, ZNF438, SVIL, JCAD, MTPAP, MAP3K8, BAMBI, WAC, MPP7, ARMC4, MKX, RAB18, YME1L1, MASTL, ACBD5, ABI1, PDSS1, APBB1IP, GAD2, MYO3A, GPR158, THNSL1, ENKUR, PRTFDC1, ARHGAP21, KIAA1217, PTF1A, ARMC3, PIP4K2A, SPAG6, gga-mir-12240, BMI1, COMMD3, DNAJC1, MLLT10, RF00001, NEBL, PLXDC2, MALRD1, ARL5B, NSUN6, CACNB2, SLC39A12, MMR1L2, MMR1L1, MMR1L3, MMR1L4, MRC1, STAM, HACD1, VIM, ST8SIA6, gga-mir-1661, TRDMT1, CUBN</i>                                                                                                                                                                                                                                   |
| Chr4: 76.4 – 79.2                                                  | 2.8 Mb        | <i>TAPT1, Prom1, FGFBP2, CD38, BST1, FBXL5, CC2D2A, C1QTNF7, CPEB2, NKX3-2, RAB28, HS3ST1, ZNF518B, WDR1, SLC2A9, DRD5, OTOP1, TMEM128, LYAR, ZBTB49, NSG1, STX18, MSX1, CYTL1, STK32B, EVC2, EVC, CRMP1B</i>                                                                                                                                                                                                                                                                                                                                                                                                                                                                                                                                                                                        |
| <b><i>Domestic chicken into Ceylon junglefowl</i></b>              |               |                                                                                                                                                                                                                                                                                                                                                                                                                                                                                                                                                                                                                                                                                                                                                                                                      |
| Chr5: 49.33 – 49.43                                                | 100 kb        | <i>No gene</i>                                                                                                                                                                                                                                                                                                                                                                                                                                                                                                                                                                                                                                                                                                                                                                                       |

\*Positions along the chromosome in megabase (Mb),



**Table S2B.** Candidate introgressed regions from non-red junglefowls into domestic chicken/Red junglefowl

| Candidate introgressed regions*                                                     | Length         | Proportion of haplotypes introgressed in each population (%)** |                       |                    |                       |                         |                      |                         | Genes within the candidate introgressed regions***                                                                                                                                                                                                                                                                                                                                                                      |
|-------------------------------------------------------------------------------------|----------------|----------------------------------------------------------------|-----------------------|--------------------|-----------------------|-------------------------|----------------------|-------------------------|-------------------------------------------------------------------------------------------------------------------------------------------------------------------------------------------------------------------------------------------------------------------------------------------------------------------------------------------------------------------------------------------------------------------------|
|                                                                                     |                | Ethiopia (n = 22)                                              | Saudi Arabia (n = 10) | Sri Lanka (n = 22) | SEA Langshan (n = 16) | SEA Kedu Hitam (n = 20) | SEA Sumatra (n = 10) | Red Junglefowl (n = 12) |                                                                                                                                                                                                                                                                                                                                                                                                                         |
| <i>Introgressed regions from Grey junglefowl to domestic chicken/Red junglefowl</i> |                |                                                                |                       |                    |                       |                         |                      |                         |                                                                                                                                                                                                                                                                                                                                                                                                                         |
| <b>Chr2:119.68 – 119.90</b>                                                         | 220 kb         | 23                                                             | 20                    | 9                  | 0                     | 0                       | 0                    | 8                       | -                                                                                                                                                                                                                                                                                                                                                                                                                       |
| Chr3:50.75 – 50.85                                                                  | 100 kb         | 27                                                             | 0                     | 23                 | 0                     | 5                       | 10                   | 0                       | <i>NOX3</i>                                                                                                                                                                                                                                                                                                                                                                                                             |
| Chr4:62.10 – 62.30                                                                  | 200 kb         | 14                                                             | 0                     | 0                  | 0                     | 0                       | 0                    | 0                       | <i>RF00003</i>                                                                                                                                                                                                                                                                                                                                                                                                          |
| Chr5:45.67 – 45.95                                                                  | 280 kb         | 41                                                             | 10                    | 9                  | 0                     | 0                       | 0                    | 0                       | <i>PPP4R4, SERPINA10, SPIA4, SPIA1, GSC</i>                                                                                                                                                                                                                                                                                                                                                                             |
| Chr6:20.72 – 20.84                                                                  | 120 kb         | 45                                                             | 0                     | 0                  | 0                     | 0                       | 0                    | 0                       | <i>IDE, Mar-05, CPEB3</i>                                                                                                                                                                                                                                                                                                                                                                                               |
| Chr7:22.65 – 22.79                                                                  | 140 kb         | 50                                                             | 0                     | 9                  | 0                     | 0                       | 0                    | 0                       | -                                                                                                                                                                                                                                                                                                                                                                                                                       |
| Chr9:23.05 – 23.55                                                                  | 500 kb         | 23                                                             | 10                    |                    | 0                     | 0                       | 20                   | 0                       | <i>KCNAB3, GMPS, gga-mir-1658, C3orf33, PLCH1, MME, GPR149, DHX36, RAP2B, ARHGEF26, P2RY1, MBNL1</i>                                                                                                                                                                                                                                                                                                                    |
| Chr12: 12.54 – 12.64                                                                | 100 kb         | 27                                                             | 0                     | 0                  | 0                     | 0                       | 0                    | 0                       | <i>FHIT</i>                                                                                                                                                                                                                                                                                                                                                                                                             |
| <i>Introgressed regions from Ceylon junglefowl to domestic chicken</i>              |                |                                                                |                       |                    |                       |                         |                      |                         |                                                                                                                                                                                                                                                                                                                                                                                                                         |
| <b>Chr1:2.90 – 9.42</b>                                                             | 6.52 Mb        | 0                                                              | 0                     | 5                  | 0                     | 0                       | 0                    | 0                       | <i>PLXNA4, gga-mir-6621, PODXL, MKLN1, gga-mir-29b-1, gga-mir-29a, K123, IL2RA, RBM17, PFKFB3, SFMBT2, ITIH5, ITIH2, KIN, ATP5F1C, TAF3, GATA3, CELF2, gga-mir-1626, gga-mir-1596, USP6NL, ECHDC3, UPF2, DHTKD1, SEC61A2, NUDT5, CDC123, CAMK1D, CCDC3, OPTN, MCM10, PHYH, SEPHS2L, BEND7, FRMD4A, gga-mir-1460, FAM107B, HSPA14, SUV39H2, DCLRE1C, MEIG1, TMEM243, DMTF1, RF02271, KIAA1324L, GRM3, SEMA3D, SEMA3A</i> |
| Chr1:25.25 – 29.21                                                                  | <b>3.95 Mb</b> | 0                                                              | 0                     | 5                  | 0                     | 0                       | 0                    | 0                       | <i>TES, TFEC, MDFIC, FOXP2, PPP1R3A, GPR85, gga-mir-1695, BMT2, TMEM168, LSMEM1, IFRD1, ZNF277, DOCK4, IMMP2L, LRRN3,</i>                                                                                                                                                                                                                                                                                               |

|                                                                             |            |   |   |   |    |   |   |   |                                                                                                      |
|-----------------------------------------------------------------------------|------------|---|---|---|----|---|---|---|------------------------------------------------------------------------------------------------------|
| Chr1:147.94 – 149.32                                                        | 1.38<br>Mb | 0 | 0 | 5 | 0  | 0 | 0 | 0 | <i>DNAJB9, THAP5, AVPR2, PNPLA8, NRCAM,<br/>gga-mir-12208, CNTN1, PDZRN4<br/>GPC6, RF00066, GPC5</i> |
| Chr3:108.33 – 108.93                                                        | 600 kb     | 0 | 0 | 9 | 0  | 0 | 0 | 0 | <i>CRISP3, CRISP2, RHAG, CYP2AC1, CYP2AC2,<br/>CENPQ, MMUT, OPN5L2, FOXP2</i>                        |
| <b><i>Introgressed region from Green junglefowl to domestic chicken</i></b> |            |   |   |   |    |   |   |   |                                                                                                      |
| Chr5: 9.54 – 9.64                                                           | 100 kb     | 0 | 0 | 0 | 63 | 0 | 0 | 0 | <i>SWAP70, WEE1, ZNF143, IPO7, RF00319</i>                                                           |

\*Positions along the chromosome in megabase (Mb), \*\*SEA (South-East and East Asia), \*\*\*Ensembl release version 96

1 **Table S3.** Functional annotations for the enriched genes within the introgressed regions

2

| <b>Gene ontology for introgressed genes from domestic chicken to Grey junglefowl</b>   |                                                                                                         |                |                                                                                                                                                  |
|----------------------------------------------------------------------------------------|---------------------------------------------------------------------------------------------------------|----------------|--------------------------------------------------------------------------------------------------------------------------------------------------|
| <b>Term</b>                                                                            | <b>Biological function</b>                                                                              | <b>P-Value</b> | <b>Genes</b>                                                                                                                                     |
| GO:0002042                                                                             | cell migration involved in sprouting angiogenesis                                                       | 0.003885481    | <i>NRP1, EFNB2, ITGB1</i>                                                                                                                        |
| GO:0030890                                                                             | positive regulation of B cell proliferation                                                             | 0.004098509    | <i>BMII, GPR183, CD38, BST1</i>                                                                                                                  |
|                                                                                        |                                                                                                         |                | <i>GPR183, RAP2A, SLC2A9, GPR158, OLFM4, NRP1, BST1, VIM, EFNB2, PCDH9, CLDN10, PCDH8, LIG4, PCDH17, APBB1IP, WBP4, ITGB1, CD38, GPC5, SVIL,</i> |
| GO:0005886                                                                             | plasma membrane                                                                                         | 0.004886068    | <i>NALCN, BAMBI, PIP4K2A, DNAJC1</i>                                                                                                             |
| GO:0007224                                                                             | smoothened signaling pathway                                                                            | 0.015997843    | <i>EVC2, EVC, DZIP1, CC2D2A</i>                                                                                                                  |
|                                                                                        |                                                                                                         |                | <i>DCT, ZBTB49, KLF6, NRP1, ZNF518B, KLF12, DZIP1, MBNL2, LIG4, ZEB1,</i>                                                                        |
| GO:0046872                                                                             | metal ion binding                                                                                       | 0.01615502     | <i>ITGB1, ZNF438, PCCA, RBM26</i>                                                                                                                |
| GO:0045595                                                                             | regulation of cell differentiation                                                                      | 0.017578595    | <i>SPRY2, SOX21, STK24</i>                                                                                                                       |
| GO:0003953                                                                             | NAD <sup>+</sup> nucleosidase activity                                                                  | 0.022841738    | <i>CD38, BST1</i>                                                                                                                                |
|                                                                                        | transcriptional repressor activity, RNA polymerase II transcription regulatory region sequence-specific |                |                                                                                                                                                  |
| GO:0001227                                                                             | binding                                                                                                 | 0.033003736    | <i>MSX1, KLF12, ZEB1</i>                                                                                                                         |
| GO:0045814                                                                             | negative regulation of gene expression, epigenetic                                                      | 0.047610409    | <i>BMII, EPC1</i>                                                                                                                                |
| <b>Gene ontology for introgressed genes from Grey junglefowl to domestic chicken</b>   |                                                                                                         |                |                                                                                                                                                  |
| GO:0050435                                                                             | Beta-amyloid metabolic process                                                                          | 0.009746297    | <i>IDE, MME</i>                                                                                                                                  |
| GO:0003725                                                                             | Double-stranded RNA binding                                                                             | 0.044235391    | <i>DHX36, MBNL1</i>                                                                                                                              |
| <b>Gene ontology for introgressed genes from Ceylon junglefowl to domestic chicken</b> |                                                                                                         |                |                                                                                                                                                  |
| GO:0030212                                                                             | hyaluronan metabolic process                                                                            | 0.021181       | <i>ITIH5, ITIH2</i>                                                                                                                              |
| GO:0009791                                                                             | Post-embryonic development                                                                              | 0.025842519    | <i>MUT, GATA3, FOXP2</i>                                                                                                                         |
| GO:0000380                                                                             | alternative mRNA splicing, via spliceosome                                                              | 0.036777       | <i>CELF2, RBM17</i>                                                                                                                              |
| GO:0045786                                                                             | negative regulation of cell cycle                                                                       | 0.04704        | <i>GATA3, THAP5</i>                                                                                                                              |
|                                                                                        |                                                                                                         |                | <i>TAF3, CENPQ, THAP5, CDC5L, OPTN, KIN, SUV39H2, FOXP2, DMTF1, MDFIC, TFEC, GATA3, CELF2, IFRD1, CAMK1D, TES</i>                                |
| GO:0005634                                                                             | nucleus                                                                                                 | 0.039752       |                                                                                                                                                  |
|                                                                                        | transcription factor activity, RNA polymerase II                                                        |                |                                                                                                                                                  |
| GO:0001135                                                                             | transcription factor recruiting                                                                         | 0.019549       | <i>DMTF1, CDC5L</i>                                                                                                                              |
| GO:0038191                                                                             | neuropilin binding                                                                                      | 0.048175       | <i>SEMA3D, SEMA3A</i>                                                                                                                            |
| GO:0044212                                                                             | transcription regulatory region DNA binding                                                             | 0.049902       | <i>DMTF1, GATA3, CDC5L</i>                                                                                                                       |
